# Supplementary material for: The Impact of Long-Term Dry-Season Irrigation on Eucalyptus Tree Height Growth: Insights from Leaf Photosynthesis and Water Conduction
Source: MDPI journal article supplement (doi:10.3390/f14102017), 2023-10-08
Supplement: s1 [file s1]

## Supplementary Materials

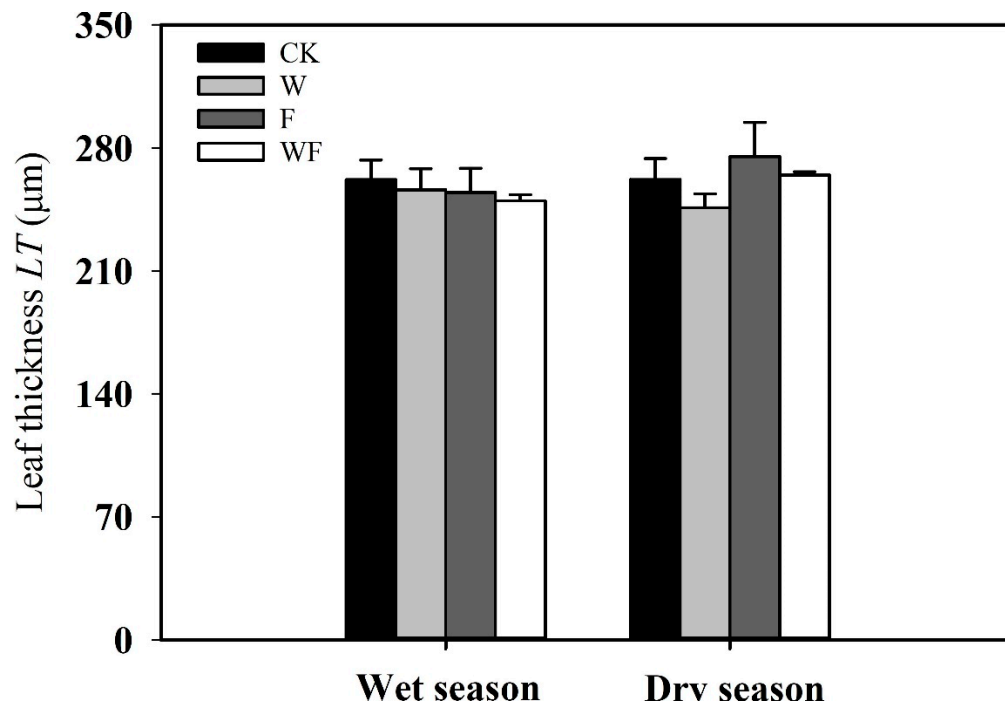

**Figure S1.** Leaf thickness of *Eucalyptus urophylla* × *grandis* under control conditions (CK), dry-season irrigation (W), fertilization (F) and both dry-season irrigation and fertilization (WF) in wet season and dry season. Regardless of whether it is the wet season or the dry season, there are no significant differences between different treatments.

**Table S1.** The total nitrogen, total phosphorus, total potassium of the soil under control conditions (CK), dry-season irrigation (W), fertilization (F) and both dry-season irrigation and fertilization (WF).

| Treatments | Total nitrogen (g/kg) | Total phosphorus (g/kg) | Total potassium (g/kg) |
|------------|-----------------------|-------------------------|------------------------|
| CK         | 0.401 ± 0.008 b       | 0.166 ± 0.008 b         | 5.732 ± 0.427 b        |
| W          | 0.386 ± 0.012 b       | 0.17 ± 0.008 b          | 5.44 ± 0.523 b         |
| F          | 0.462 ± 0.018 a       | 0.213 ± 0.007 a         | 8.708 ± 0.235 a        |
| WF         | 0.388 ± 0.037 b       | 0.187 ± 0.006 b         | 7.733 ± 0.45 a         |

Mean value ± SE. Lowercase letters indicate significant differences ( $p < 0.05$ ).
