# Supplementary material for: The Impact of Long-Term Dry-Season Irrigation on Eucalyptus Tree Height Growth: Insights from Leaf Photosynthesis and Water Conduction
Source: MDPI journal article supplement (doi:10.3390/f14102017), 2023-10-08
Supplement: s1 [file s1]

Archive with 1 entries (1 files):
- forests-2626580-supplementary.pdf
